# Supplementary material for: Distribution of major lymphocyte subsets and memory T-cell subpopulations in healthy adults employing GLP-conforming multicolor flow cytometry
Source: PubMed Central journal article supplement (PMC8478656; doi:10.1038/s41375-021-01348-5), 2021-07-21

# Supplementary Figure 1

**A**

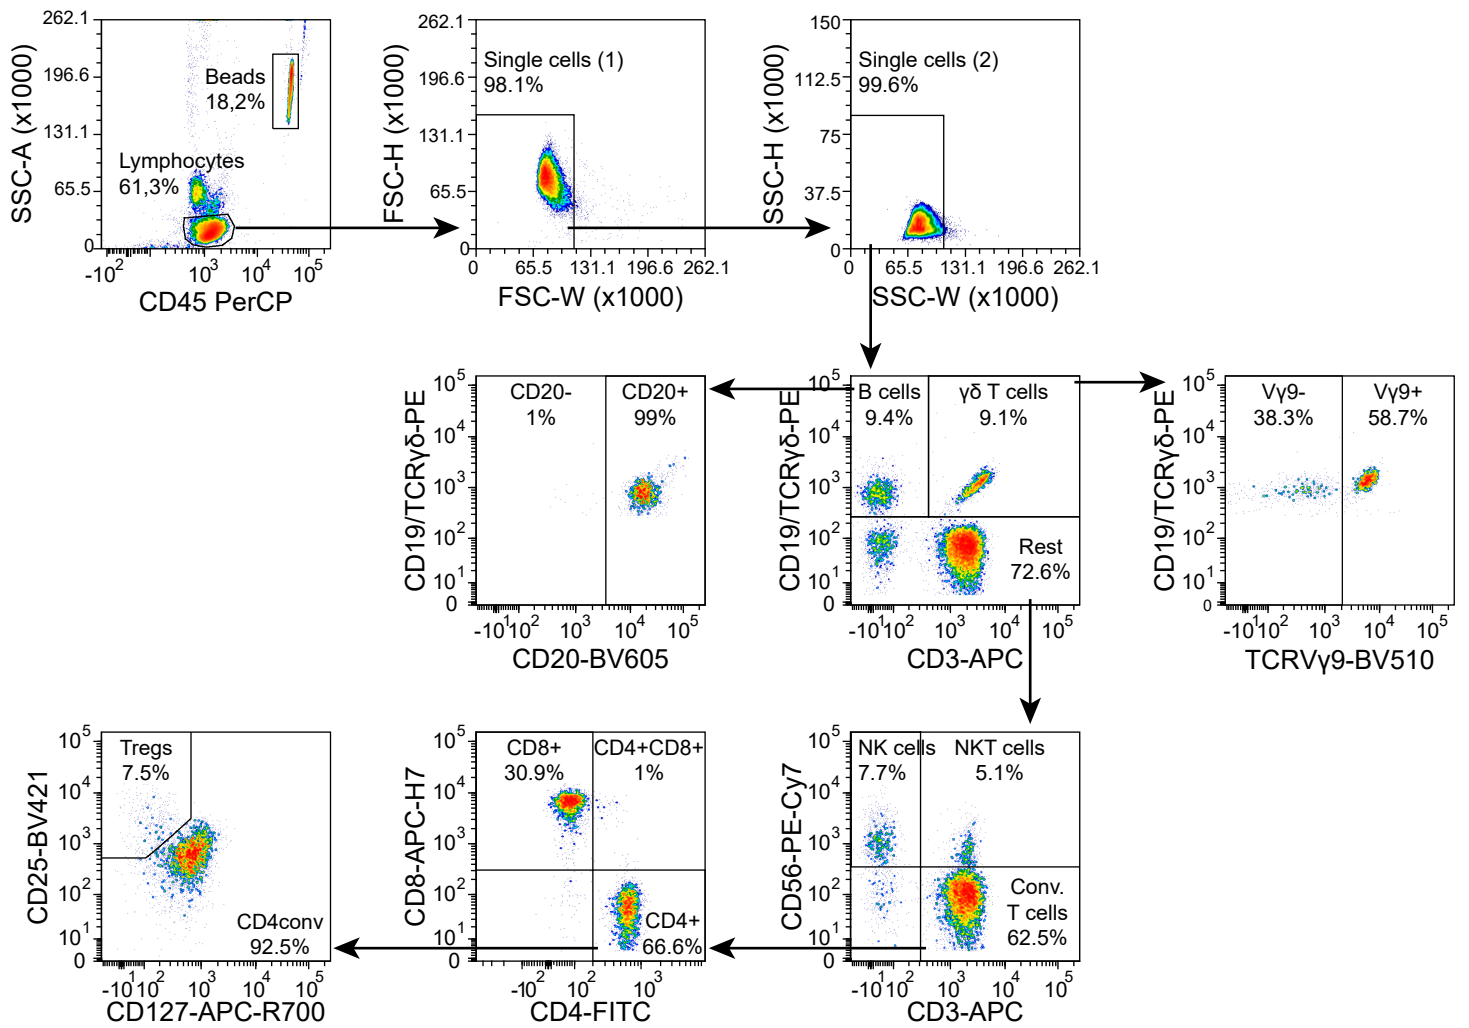

**B**

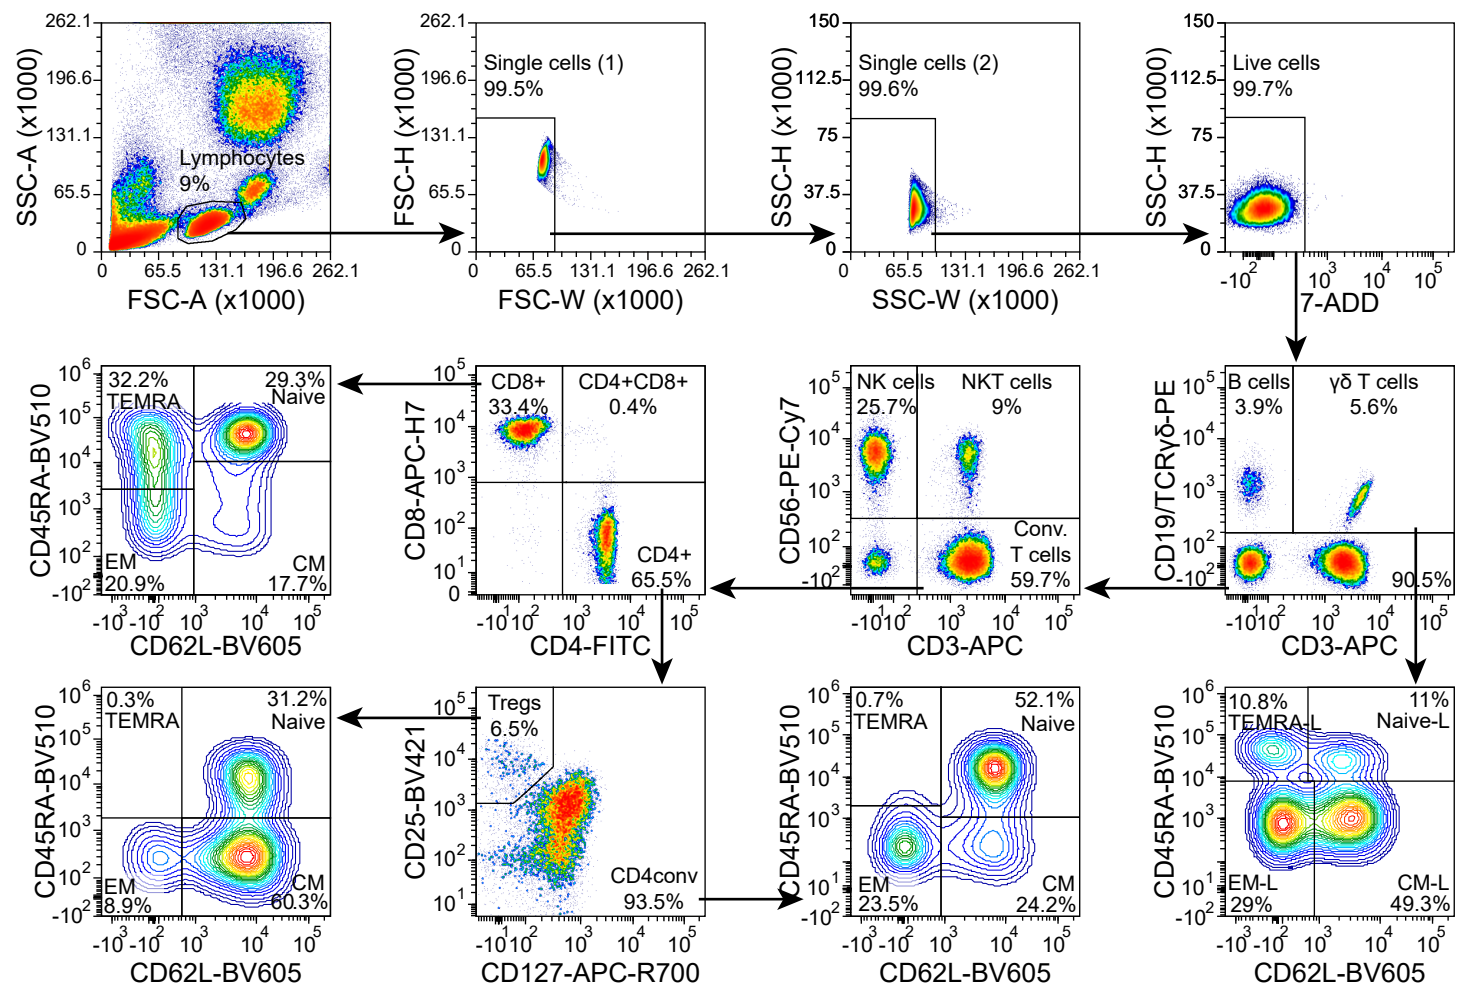

Supplement: 41375_2021_1348_MOESM2_ESM.pdf [file 41375_2021_1348_MOESM2_ESM.pdf]
